# Supplementary material
Source: HighWire-hosted journal article supplement (https://bmjopen.bmj.com/content/6/9/e012092)
Supplement: inline-supplementary-material-2 [file inline-supplementary-material-2.pdf]

## Appendix B – Data extraction strategy and allocation of tasks

| <b>Task</b>                | <b>Description</b>                                                                                                                                                                                                                                                                                                                                                                                                                                                                                                                                                                                                                                                                                                                                                           | <b>Undertaken by:</b>                                                           |
|----------------------------|------------------------------------------------------------------------------------------------------------------------------------------------------------------------------------------------------------------------------------------------------------------------------------------------------------------------------------------------------------------------------------------------------------------------------------------------------------------------------------------------------------------------------------------------------------------------------------------------------------------------------------------------------------------------------------------------------------------------------------------------------------------------------|---------------------------------------------------------------------------------|
| <b>Case identification</b> | <ol style="list-style-type: none"> <li>1. Review of patient lists from all mesothelioma MDT meetings between 1/1/4 and 31/12/15, recorded prospectively on the National Cancer Database.</li> <li>2. Review of local archive of mesothelioma MDT meeting outcomes, recorded at the time of discussion at the mesothelioma MDT meeting.</li> <li>3. Review of mesothelioma database, collected prospectively as part of the Investigating Pleural Disease Study</li> </ol>                                                                                                                                                                                                                                                                                                    | <p>AB</p> <p>AB, SS</p> <p>AB</p>                                               |
| <b>Data Extraction</b>     | <ol style="list-style-type: none"> <li>4. Retrieval and review of mesothelioma meeting proformas for all available cases from electronic archive</li> <li>5. Retrieval and review of MDT meeting referral letters and MDT meeting outcome letters for all available cases from electronic records</li> <li>6. Cross-referencing of MDT meeting outcomes for all cases with summary reports recorded on the National Cancer Database</li> <li>7. Review of MDT coordinator's email account for electronic records of dispatch dates for MDT meeting outcomes</li> <li>8. Review of online clinical trials register to determine clinical trial participation</li> <li>9. Contact of local coroner's offices to enquire how many patients had avoided a post-mortem</li> </ol> | <p>AB, KW</p> <p>AB</p> <p>AB, SS</p> <p>AB, KW</p> <p>AB</p> <p>AB, SS, NB</p> |
